# Supplementary material
Source: PubMed Central journal article supplement (PMC6876301)
Supplement: NIHMS1058853-supplement-SI.pdf [file NIHMS1058853-supplement-SI.pdf]

**Electronic Supplementary Information for *Soft Matter* manuscript:**

**The stabilization of primitive bicontinuous cubic phases with tunable swelling over a wide  
composition range**

Sherry S. W. Leung and Cecilia Leal\*

Department of Materials Science and Engineering, University of Illinois at Urbana-Champaign,

\*Correspondence and requests for materials should be addressed to Cecilia Leal (email:  
[cecilial@illinois.edu](mailto:cecilial@illinois.edu))

Keywords: lipids; bicontinuous cubic phase; swelling; SAXS; Cryo-EM

**Supplementary Information**

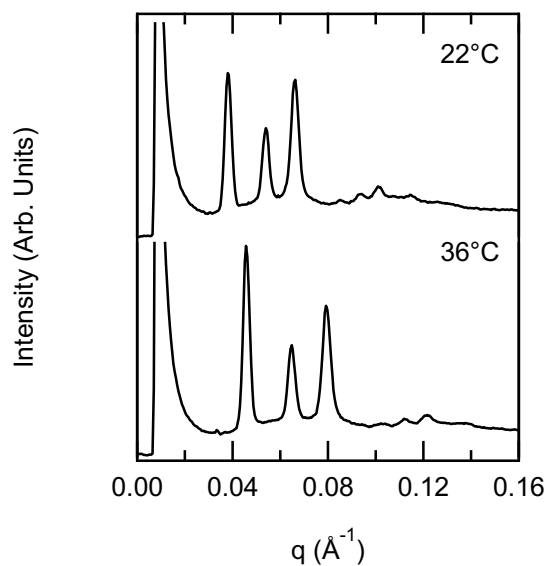

Figure S1. Radially integrated SAXS diffraction pattern for 94:4:2 (mol%)  
GMO/DOTAP/DOPE-PEG at 22 and 36°C. The primitive cubic phase is stable at physiological  
temperature.

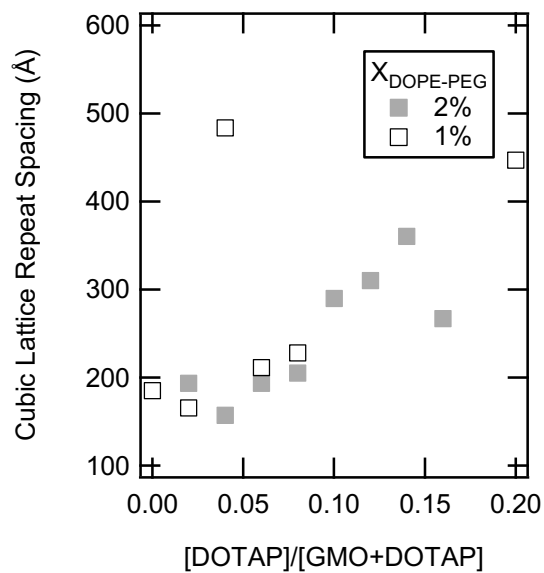

Figure S2. Cubic lattice spacing ( $a^0$ ) for GMO/DOTAP/DOPE-PEG. Total lipid concentration is 250 mM.

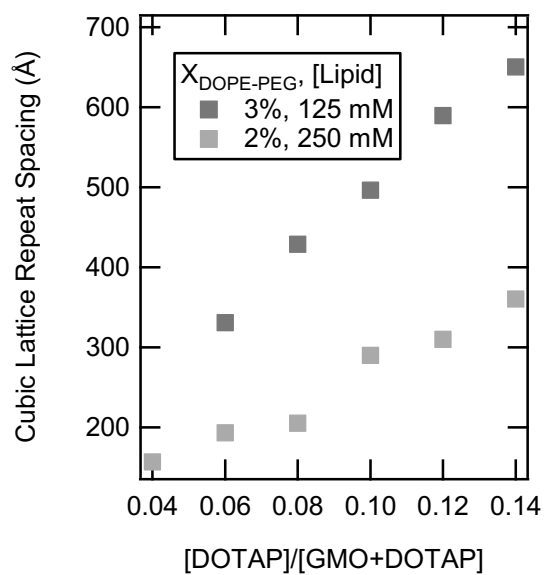

Figure S3. Indirect comparison of cubic lattice spacing ( $a^0$ ) for GMO/DOTAP/DOPE-PEG at different concentrations.

Table S1. Phase, lattice spacing and estimated water channel diameter information for GMO/DOTAP/DOPE-PEG systems in excess water. Total lipid concentration is 250 mM for 1&2 mol% DOPE-PEG and 125 mM for 3&5 mol% DOPE-PEG.

| Composition (mol%) |      |       | Phase      | Lattice Spacing (Å) | Water Channel Diameter (Å) |
|--------------------|------|-------|------------|---------------------|----------------------------|
| DOPE-PEG           | GMO  | DOTAP |            |                     |                            |
| 5.00               | 0    | 95.0  | L $\alpha$ | 272                 | -                          |
| 5.00               | 9.50 | 85.5  | L $\alpha$ | 284                 | -                          |
| 5.00               | 19.0 | 76.0  | L $\alpha$ | 303                 | -                          |
| 5.00               | 28.5 | 66.5  | L $\alpha$ | 331                 | -                          |
| 5.00               | 47.5 | 47.5  | L $\alpha$ | 334                 | -                          |
| 5.00               | 79.8 | 15.2  | L $\alpha$ | 401                 | -                          |
| 5.00               | 81.7 | 13.3  | Pn3m       | 337                 | 253                        |
| 5.00               | 83.6 | 11.4  | Pn3m       | 589                 | 444                        |
| 5.00               | 85.5 | 9.50  | Pn3m       | 325                 | 245                        |
| 5.00               | 87.4 | 7.60  | Pn3m       | 331                 | 249                        |
| 5.00               | 89.3 | 5.70  | Pn3m       | 331                 | 250                        |
| 5.00               | 91.2 | 3.80  | L $\alpha$ | 262                 | -                          |
| 5.00               | 93.1 | 1.90  | L $\alpha$ | 333                 | -                          |
| 3.00               | 0    | 97.0  | L $\alpha$ | 360                 | -                          |
| 3.00               | 9.70 | 87.3  | L $\alpha$ | 325                 | -                          |
| 3.00               | 19.4 | 77.6  | L $\alpha$ | 336                 | -                          |
| 3.00               | 38.8 | 58.2  | L $\alpha$ | 381                 | -                          |
| 3.00               | 58.2 | 38.8  | L $\alpha$ | 290                 | -                          |
| 3.00               | 67.9 | 29.1  | L $\alpha$ | 267                 | -                          |
| 3.00               | 83.4 | 13.6  | Im3m       | 650                 | 382                        |
| 3.00               | 85.4 | 11.6  | Im3m       | 589                 | 347                        |
| 3.00               | 87.3 | 9.70  | Im3m       | 496                 | 292                        |
| 3.00               | 89.2 | 7.76  | Im3m       | 429                 | 253                        |
| 3.00               | 91.2 | 5.82  | Im3m       | 331                 | 197                        |
| 3.00               | 95.1 | 1.94  | Im3m       | 382                 | 225                        |
| 2.00               | 0    | 98.0  | L $\alpha$ | 162                 | -                          |
| 2.00               | 78.4 | 19.6  | Im3m       | 278                 | 157                        |
| 2.00               | 84.3 | 13.7  | Im3m       | 267                 | 152                        |
| 2.00               | 86.2 | 11.8  | Im3m       | 360                 | 205                        |
| 2.00               | 88.2 | 9.80  | Im3m       | 310                 | 176                        |
| 2.00               | 90.2 | 7.84  | Im3m       | 290                 | 165                        |
| 2.00               | 92.1 | 5.88  | Im3m       | 205                 | 117                        |
| 2.00               | 94.1 | 3.92  | Im3m       | 193                 | 110                        |
| 2.00               | 96.0 | 1.96  | Im3m       | 157                 | 90                         |
| 2.00               | 98.0 | 0     | Im3m       | 193                 | 111                        |
| 1.00               | 0    | 99.0  | L $\alpha$ | 225                 | -                          |
| 1.00               | 19.8 | 79.2  | L $\alpha$ | 204                 | -                          |
| 1.00               | 29.7 | 69.3  | L $\alpha$ | 228                 | -                          |
| 1.00               | 39.6 | 59.4  | L $\alpha$ | 257                 | -                          |
| 1.00               | 49.5 | 49.5  | L $\alpha$ | 283                 | -                          |
| 1.00               | 59.4 | 39.6  | Im3m       | 436                 | 244                        |
| 1.00               | 69.3 | 29.7  | Im3m       | 310                 | 175                        |
| 1.00               | 91.1 | 7.92  | Im3m       | 228                 | 130                        |
| 1.00               | 93.1 | 5.94  | Im3m       | 211                 | 121                        |
| 1.00               | 95.0 | 3.96  | Im3m       | 484                 | 277                        |
| 1.00               | 97.0 | 1.98  | Im3m       | 165                 | 95                         |
| 1.00               | 99.0 | 0     | Im3m       | 185                 | 106                        |
